# Supplementary material for: Seed development-related genes contribute to high yield heterosis in integrated utilization of elite autotetraploid and neo-tetraploid rice
Source: Frontiers journal article supplement (doi:10.3389/fpls.2024.1421207), 2024-06-12
Supplement: Data_Sheet_1.PDF [file Data_Sheet_1.PDF]

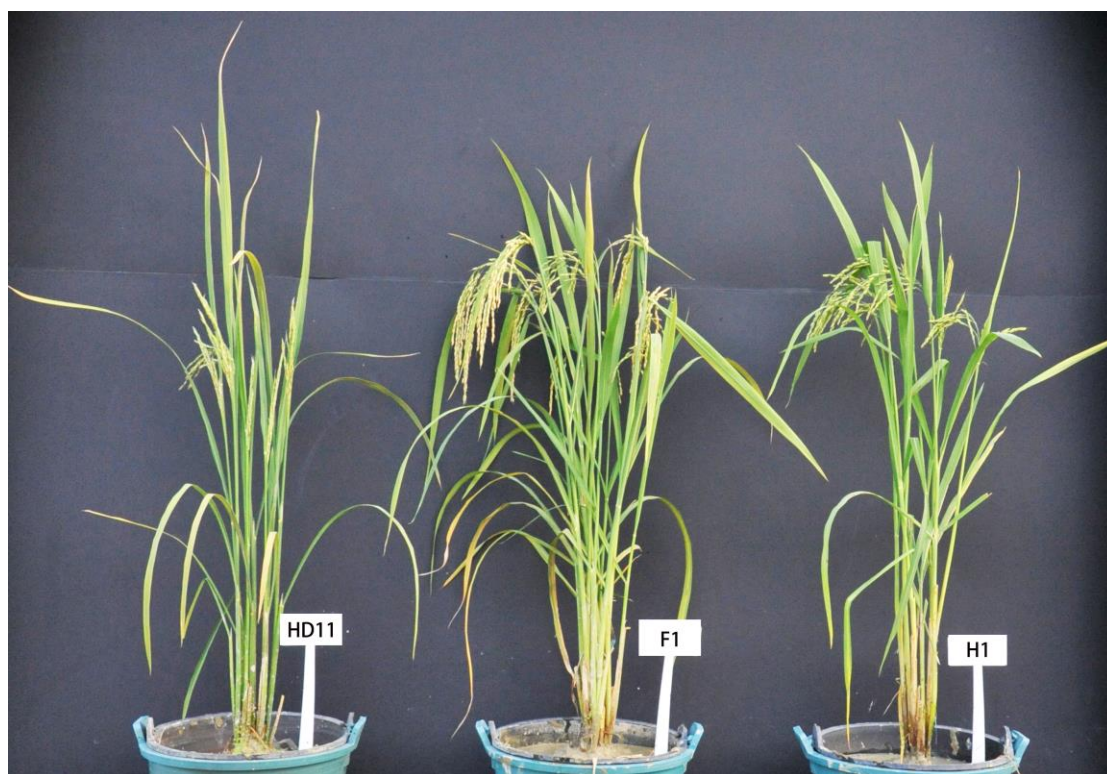

**Figure S1.** Plant morphology of neo-tetraploid hybrid rice (HD11×H1).

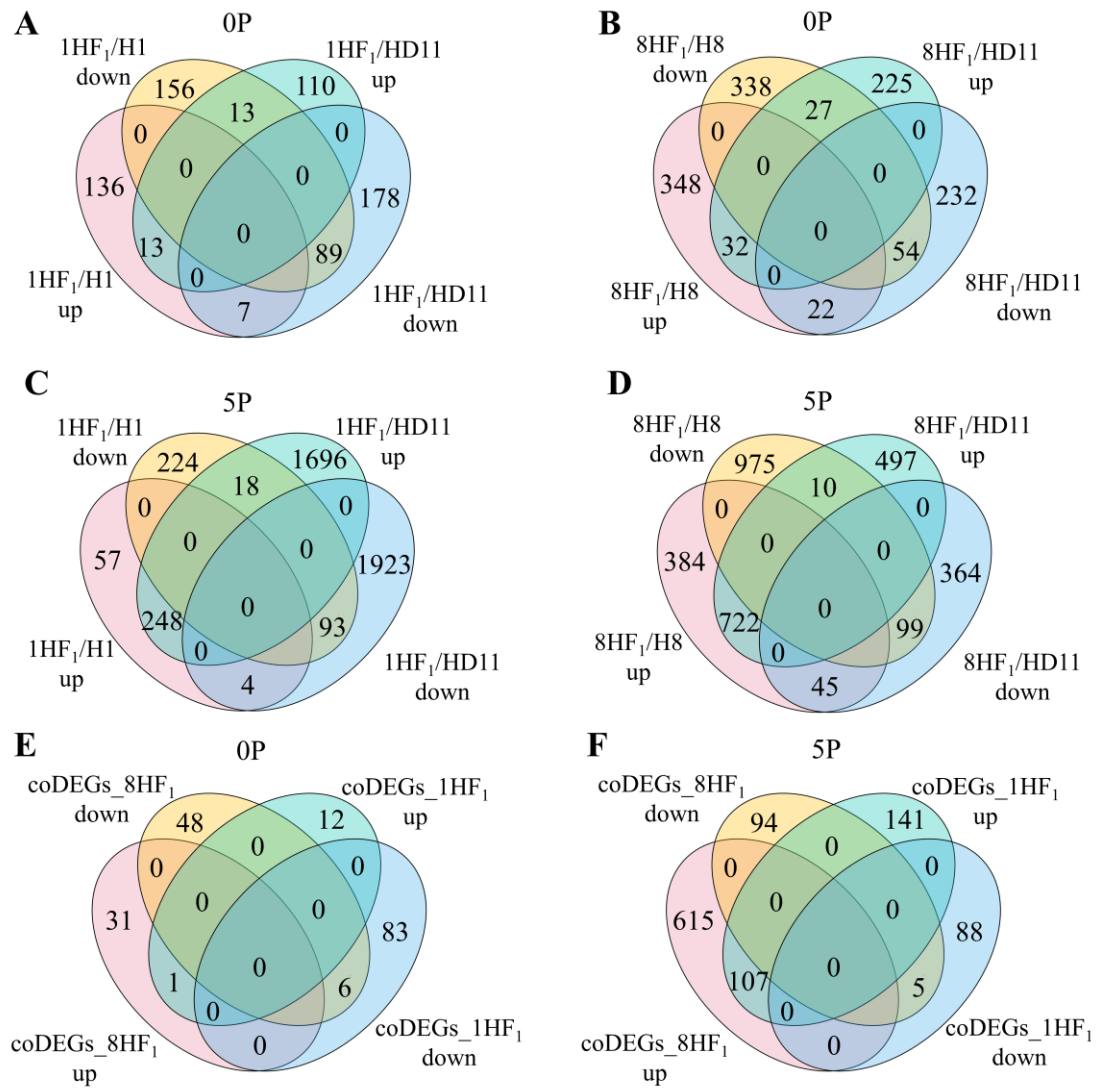

**Figure S2.** Identification of common differentially expressed genes of tetraploid hybrids.

(A) Identification of coDEGs in 1HF<sub>1</sub> during 0P relative to H1 and HD11; (B) Identification of coDEGs in 8HF<sub>1</sub> during 0P relative to H8 and HD11; (C) Identification of coDEGs in 1HF<sub>1</sub> during 5P relative to H1 and HD11; (D) Identification of coDEGs in 8HF<sub>1</sub> during 5P relative to H8 and HD11; (E) Identification of overlapped coDEGs in 1HF<sub>1</sub> and 8HF<sub>1</sub> during 0P; (F) Identification of overlapped coDEGs in 1HF<sub>1</sub> and 8HF<sub>1</sub> during 5P.

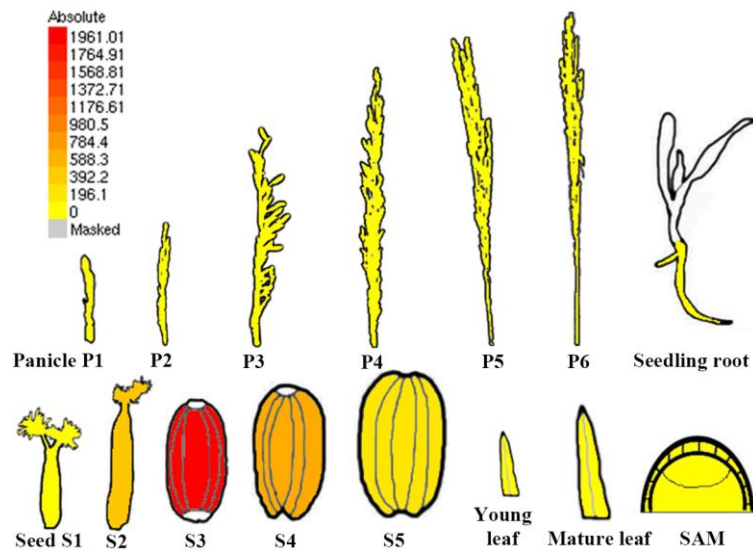

**Figure S3.** Expression pattern of *OsFl3* via eFP.

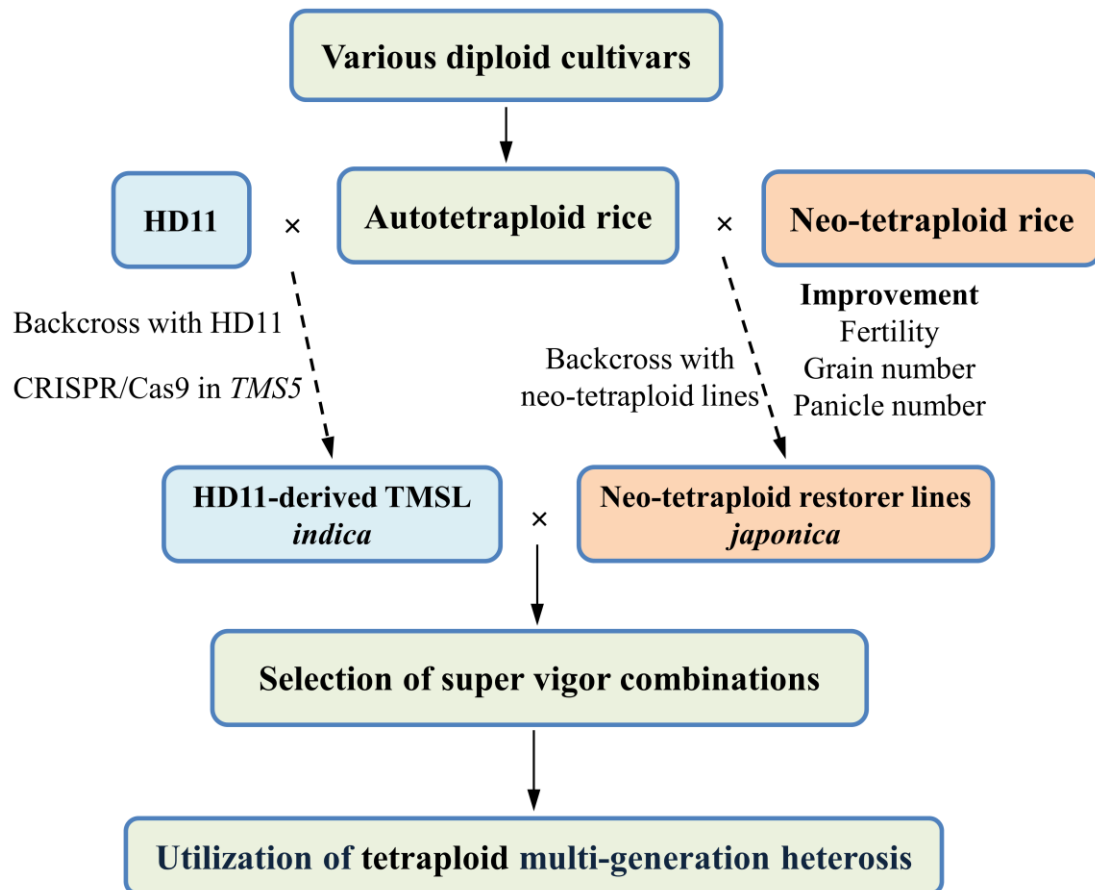

**Figure S4.** Key strategy for future intersubspecific tetraploid hybrid rice breeding.
