# Supplementary material for: Seed development-related genes contribute to high yield heterosis in integrated utilization of elite autotetraploid and neo-tetraploid rice
Source: Front Plant Sci. 2024 Jun 12;15:1421207. doi: 10.3389/fpls.2024.1421207 (PMC11204133; doi:10.3389/fpls.2024.1421207)
Supplement: Supplementary file 2 [file Table_1.xlsx]

## Sheet: S1
Table S1. Primer information for genotyping
Primers	Sequence (from 5'- 3')	Usage
OsFl3-TF	ATGCCAACTATGTGCTTGCTCT	Sequencing OsFl3 target site
OsFl3-TR	AACTCAGATACTTTTACCACGTCGT	Sequencing OsFl3 target site
SHRG2-TF	CTTCATTATTGTGGCATGTCCTTAC	Sequencing SHRG2 target site
SHRG2-TR	CCCTCAGTTGATGGCTTTCC	Sequencing SHRG2 target site
Hyg-F	ACGGTGTCGTCCATCACAGTTTGCC	Molecular marker for hygromycin resistance gene
Hyg-R	TTCCGGAAGTGCTTGACATTGGGGA	Molecular marker for hygromycin resistance gene

## Sheet: S2
Table S2. Agronomic traits of hybrids of HD11 resulting from the cross between HD11 and neo-tetraploid rice
Hybrids	Panicle number	Grain numbers	Seed setting (%)	1000-grain weight (g)	Grain yield per plant (g)
HD11×Huaduo1025	4.00±1.58	437.60±115.43	79.29±1.65	38.80±6.00	16.98±0.69
HD11×Huaduo1075	3.00±0.63	503.50±83.31	79.30±7.16	42.67±13.81	21.48±1.15
HD11×Huaduo1073	3.33±0.52	420.17±77.79	70.91±7.06	37.57±2.69	15.78±0.21
HD11×Huaduo1060	3.29±0.49	395.86±138.56	72.62±13.03	43.79±24.36	17.33±3.38
HD11×Huaduo1022	1.50±0.58	265.25±107.26	83.42±2.19	36.49±3.64	9.68±0.39
HD11×Huaduo1034	4.25±0.50	512.00±143.82	82.52±2.80	37.07±0.94	18.98±0.14
HD11×Huaduo1084	3.33±1.53	385.67±182.94	75.07±6.10	42.29±12.45	16.31±2.28
HD11×Huaduo1174	3.20±0.84	529.20±134.32	74.84±14.83	47.82±34.23	25.31±4.60
HD11×Huaduo1030	3.50±1.22	454.33±168.28	76.54±8.35	37.56±11.55	17.06±1.94
HD11×Huaduo1056	2.50±0.58	378.25±49.58	70.63±7.90	32.20±4.10	12.18±0.20
HD11×Huaduo1054	4.67±1.03	570.83±227.93	80.71±1.95	36.33±3.21	20.74±0.73
HD11×Huaduo1038	4.17±1.94	616.83±398.70	69.06±12.55	37.74±2.08	23.28±0.83
HD11×Huaduo1035	5.00±1.73	630.43±255.72	76.69±6.47	37.39±1.03	23.57±0.26
HD11×Huaduo1037	4.38±3.50	663.25±547.21	79.42±8.25	37.67±6.77	24.98±3.70
HD11×Huaduo1041	4.00±1.00	514.60±155.42	81.42±4.69	35.54±2.15	18.29±0.33
HD11×Huaduo1403	5.50±1.91	588.50±121.60	76.45±12.50	44.97±13.44	26.46±1.63
HD11×Huaduo1134	4.67±0.58	359.33±143.14	71.90±6.82	38.25±0.48	13.74±0.07
HD11×Huaduo1028	3.29±1.38	538.71±170.28	78.92±6.22	43.72±11.20	23.55±1.91
HD11×Huaduo1039	3.67±1.53	356.00±123.47	71.32±4.50	32.38±2.82	11.53±0.35
HD11×Huaduo1044	4.33±0.52	453.50±212.00	73.30±8.78	36.81±5.21	16.69±1.11
HD11×Huaduo1045	3.25±0.96	318.00±91.29	73.56±8.68	42.69±4.30	13.58±0.39
HD11×Huaduo1414	5.20±1.30	537.40±174.76	79.22±5.65	38.96±5.77	20.94±1.01
HD11×Huaduo1021	3.50±1.05	423.00±175.66	81.14±3.79	32.20±2.90	13.62±0.51
HD11×Huaduo1036	4.33±1.53	539.67±321.08	69.93±8.03	36.37±3.27	19.63±1.05
HD11×Huaduo1443	3.80±0.84	564.60±131.95	76.49±7.95	31.86±3.31	17.99±0.44
HD11×Huaduo1043	3.29±1.11	398.29±140.21	69.78±11.40	33.34±6.23	13.28±0.87
HD11×Huaduo1125	3.09±0.70	473.73±133.06	77.66±6.47	33.70±3.46	15.97±0.46
HD11×Huaduo1040	3.29±1.61	474.86±238.52	70.90±23.25	34.70±9.08	16.48±2.16
HD11×Huaduo1012	5.00±1.00	530.33±168.51	71.28±6.43	31.32±1.34	16.61±0.23
HD11×Huaduo1241	3.83±0.75	577.00±113.27	73.93±10.07	36.82±2.74	21.24±0.31
HD11×Huaduo1221	3.40±0.55	493.00±190.31	73.58±6.40	31.19±2.17	15.38±0.41
HD11×Huaduo1433	4.88±0.83	473.85±140.70	75.33±6.70	35.63±3.34	16.88±0.47
Mean	3.83	481.93	75.41	37.32	18.02

## Sheet: S3
Table S3. Specific homologous mutant genes with known function in HD11 compared with HHZ
MSU_ID	RAP ID	Alt_Allele_Function	Gene	Category
LOC_Os03g14310	Os03g0247300	hybrid male sterility	Sc	Yield components
LOC_Os06g39810	None	increasing blight resistance	Xa27	Biotic Stress
LOC_Os04g55920	Os04g0653000	decreasing root length and weight	OsJAZ1	Abiotic Stress
LOC_Os01g59660	Os01g0812000	Pollen development.	gamyb	Physiological trait
LOC_Os02g09750	Os02g0190600	Pre-harvest sprouting. Photo bleaching.	b-OsLCY	Physiological trait
LOC_Os06g45500	Os06g0665800	Sensitivity to Cu and Zn.	oshma9	Resistance or Tolerance
LOC_Os03g60509	Os03g0819600	Flavonoid content. Seed color. Internode color.	gh1	Morphological trait
LOC_Os05g06270	Os05g0154600	Resistance to Magnaporthe oryzae.	APIP6	Resistance or Tolerance
LOC_Os04g59610	Os04g0692600	Dark induced leaf senescenc. Panicle color.	SGRL	Physiological trait
LOC_Os02g32660	Os02g0528200	"starch biosynthesis in endosperm,amlyopectin biosynthesis, branch formation"	BE2b	Physiological trait
LOC_Os06g05520	Os06g0147800	salinity tolerance by regulating OsMPK4	OsMKK1	Resistance or Tolerance
LOC_Os02g33330	Os02g0536500		ACL2
LOC_Os03g58600	Os03g0800200		MEL1
LOC_Os04g01130	Os04g0101300		MRG701
LOC_Os06g50900	Os06g0724800		OsbHLH155
LOC_Os02g02870	Os02g0121100		OsCSP1
LOC_Os02g53720	Os02g0777400		OsER2
LOC_Os02g50040	Os02g0733300		OsGH9B1
LOC_Os02g02540	Os02g0117500		OsGLR3.2
LOC_Os02g53690	Os02g0776900		OsGRF1
LOC_Os04g13540	Os04g0213100		OsHFP
LOC_Os01g47900	Os01g0669100		OsLSK1
LOC_Os07g24010	None		OsML2
LOC_Os12g13800	Os12g0240900		OsNOMT
LOC_Os11g08080	Os11g0183700		OsSWI3C
LOC_Os12g31860	Os12g0503000		OsUPS1
LOC_Os11g14430	Os11g0250000		RBS1
LOC_Os02g45054	Os02g0672100		SID1

## Sheet: S4
Table S4. GO terms of specific homologous mutant genes with known functions in HD11 compared with HHZ
GO term	Ontology	Description	Number in input list	Number in BG/Ref	p-value
GO:0006259	P	DNA metabolic process	249	4515	6.7e-49
GO:0006278	P	RNA-dependent DNA replication	171	2826	2.1e-35
GO:0015074	P	DNA integration	182	3168	3.3e-35
GO:0006260	P	DNA replication	172	2898	1.2e-34
GO:0006139	P	nucleobase, nucleoside, nucleotide and nucleic acid metabolic process	263	6695	1.4e-26
GO:0006807	P	nitrogen compound metabolic process	263	7073	6.8e-23
GO:0006333	P	chromatin assembly or disassembly	70	982	2.7e-17
GO:0006325	P	chromatin organization	70	1018	1.5e-16
GO:0051276	P	chromosome organization	70	1024	2e-16
GO:0044260	P	cellular macromolecule metabolic process	291	9350	2.2e-14
GO:0006996	P	organelle organization	70	1129	2e-14
GO:0043170	P	macromolecule metabolic process	312	10433	1.7e-13
GO:0034645	P	cellular macromolecule biosynthetic process	186	5248	1.3e-12
GO:0016043	P	cellular component organization	70	1240	1.4e-12
GO:0009059	P	macromolecule biosynthetic process	186	5252	1.3e-12
GO:0009058	P	biosynthetic process	195	6085	1.9e-09
GO:0044249	P	cellular biosynthetic process	189	5890	3.8e-09
GO:0044238	P	primary metabolic process	326	11969	1.1e-08
GO:0044237	P	cellular metabolic process	298	10696	1.4e-08
GO:0008152	P	metabolic process	355	14398	0.00015
GO:0009987	P	cellular process	321	12839	0.00021
GO:0006508	P	proteolysis	52	1579	0.0025
GO:0003676	F	nucleic acid binding	343	8251	1.6e-46
GO:0034061	F	DNA polymerase activity	172	2851	1.8e-35
GO:0003964	F	RNA-directed DNA polymerase activity	171	2826	2.1e-35
GO:0016779	F	nucleotidyltransferase activity	173	2981	1.1e-33
GO:0003723	F	RNA binding	174	3190	9.8e-31
GO:0016772	F	transferase activity, transferring phosphorus-containing groups	194	4781	2.6e-19
GO:0003682	F	chromatin binding	70	913	7.3e-19
GO:0003677	F	DNA binding	197	5059	1e-17
GO:0008270	F	zinc ion binding	165	3939	3.1e-17
GO:0005488	F	binding	444	16823	8e-15
GO:0004523	F	ribonuclease H activity	71	1194	9e-14
GO:0016891	F	endoribonuclease activity, producing 5'-phosphomonoesters	71	1210	1.6e-13
GO:0016893	F	endonuclease activity, active with either ribo- or deoxyribonucleic acids and producing 5'-phosphomonoesters	71	1214	1.9e-13
GO:0004521	F	endoribonuclease activity	71	1221	2.5e-13
GO:0004540	F	ribonuclease activity	71	1241	5.2e-13
GO:0016740	F	transferase activity	211	6190	5.8e-13
GO:0004519	F	endonuclease activity	71	1253	8e-13
GO:0046914	F	transition metal ion binding	176	4875	1.6e-12
GO:0004518	F	nuclease activity	72	1337	5.3e-12
GO:0046872	F	metal ion binding	183	5476	3.2e-10
GO:0043169	F	cation binding	186	5696	1.4e-09
GO:0043167	F	ion binding	186	5700	1.5e-09
GO:0070001	F	aspartic-type peptidase activity	36	607	1.7e-07
GO:0004190	F	aspartic-type endopeptidase activity	36	607	1.7e-07
GO:0016788	F	hydrolase activity, acting on ester bonds	76	1949	9.7e-07
GO:0004175	F	endopeptidase activity	37	856	0.0001
GO:0016787	F	hydrolase activity	142	4901	0.00017
GO:0016844	F	strictosidine synthase activity	5	24	0.00034
GO:0016843	F	amine-lyase activity	5	24	0.00034
GO:0070011	F	peptidase activity, acting on L-amino acid peptides	50	1470	0.0016
GO:0008233	F	peptidase activity	50	1489	0.0021
GO:0016840	F	carbon-nitrogen lyase activity	5	40	0.0026
GO:0003824	F	catalytic activity	310	12724	0.0027
GO:0044427	C	chromosomal part	70	989	3.8e-17
GO:0000785	C	chromatin	70	973	1.7e-17
GO:0005694	C	chromosome	71	1018	4.5e-17
GO:0043232	C	intracellular non-membrane-bounded organelle	74	1494	1.1e-10
GO:0043228	C	non-membrane-bounded organelle	74	1494	1.1e-10
GO:0044422	C	organelle part	73	1521	5.5e-10
GO:0044446	C	intracellular organelle part	73	1521	5.5e-10
GO:0005634	C	nucleus	77	1884	1.4e-07
GO:0043231	C	intracellular membrane-bounded organelle	79	2296	4.8e-05
GO:0043227	C	membrane-bounded organelle	79	2319	6.6e-05
GO:0043229	C	intracellular organelle	84	2859	0.0033
GO:0043226	C	organelle	84	2859	0.0033

## Sheet: S5
Table S5. Specific homologous mutant genes with known function in HD11 compared with ATR
MSU_ID	RAP ID	Alt_Allele_Function	Gene	Category
LOC_Os01g10490	Os01g0201600	Dwarfism. Gibberellin sensitivity.	OsGAE1	Morphological trait
LOC_Os01g10504	Os01g0201700	Floral organ identity.	OsMADS3	Morphological trait
LOC_Os01g59120	Os01g0805600	Endosperm formation. Embryo size.	CycB1;1	Morphological trait
LOC_Os02g08100	Os02g0177600	Lignin content. Dwarfism. Culm length. Anther development.	Os4CL3	Morphological trait
LOC_Os02g12380	Os02g0215200	Flag leaf morphology. Semi-dwarf. Awn development.	HDA710	Morphological trait
LOC_Os03g46640	Os03g0669100	Dwarfism. Node and lamina joint color. Grain size. Fertility.	RGB1	Morphological trait
LOC_Os05g15630	Os05g0245300	Internode elongation. Cell elongation. Leaf angle. Brassinosteroid sensitivity.	OsBLE3	Morphological trait
LOC_Os06g39640	Os06g0597400	Maintainance of shoot apical meristem. Leaf development.	OsPNH1	Morphological trait
LOC_Os08g41090	Os08g0522400	Dwarfism.	OsAPx-R	Morphological trait
LOC_Os08g41950	Os08g0531700	Floral organ formation.	OsMADS7	Morphological trait
LOC_Os10g25170	Os10g0390800	Internode elongation.	EBL1	Morphological trait
LOC_Os01g42710	Os01g0612700	Bacterial blight resistance. Dwafism restored by exogenous GA3 treatment.	OsLOL2	Morphological trait
LOC_Os10g05750	Os10g0148100	Cold tolerance. Floral organ development.	OsPRP3	Morphological trait
LOC_Os01g10040	Os01g0197100	Brassinosteroid biosynthesis. Leaf angle. Grain size.	d2	Morphological trait
LOC_Os01g34350	Os01g0527600	Shoot apical meristem formation.	shl2	Morphological trait
LOC_Os02g31140	Os02g0516400	Curly leaf. Leaf cuticle development.	cfl1	Morphological trait
LOC_Os02g45770	Os02g0682200	Floral organ identity.	mfo1	Morphological trait
LOC_Os02g47970	Os02g0709400	Leaf rolling. Identity of adaxial and abaxial of leaf. Shoot organization.	adl1	Morphological trait
LOC_Os03g13370	Os03g0236966	Dwarfism.	Osapc6	Morphological trait
LOC_Os03g33650	Os03g0449200	Leaf rolling.	OsAGO7	Morphological trait
LOC_Os04g32510	Os04g0396500	Axillary meristem formation. Tillering. Panicle branching.	lax2	Morphological trait
LOC_Os04g46470	Os04g0550600	Tillering dwarf. Tiller bud outgrowth. Strigolactone biosynthesis.	d17	Morphological trait
LOC_Os04g52479	Os04g0615000	Narrowed leaf. Dwarfism. Number of longitudinal vein. Regulation of auxin transport.	nal1	Morphological trait
LOC_Os05g03040	Os05g0121600	Seed amylose content. Grain size.	rsr1	Morphological trait
LOC_Os05g06280	Os05g0154700	Grain length. Grain cell elongation.	srs3	Morphological trait
LOC_Os05g26890	Os05g0333200	Dwarfism.	d1	Morphological trait
LOC_Os05g38000	Os05g0454200	Small cuticular papillae formation on leaf.	bgl	Morphological trait
LOC_Os06g03710	Os06g0127800	Dwarfism. Regulation of gibberellin biosynthesis.	dlt	Morphological trait
LOC_Os06g04540	Os06g0136900	Floral organ number. Palea formation.	dp1	Morphological trait
LOC_Os06g06050	Os06g0154200	Tillering dwarf. Tiller bud outgrowth.	d3	Morphological trait
LOC_Os06g10880	Os06g0211200	Drought and salinity tolerance. ABA sensitivity during germination and seedling stage	Osabf2	Morphological trait
LOC_Os06g39590	Os06g0597000	Root development. Quiescent center identity. Auxin sensitivity.	OsIAA23	Morphological trait
LOC_Os07g39480	Os07g0583700	Dwarfism. Grain size. Cell elongation.	oswrky78	Morphological trait
LOC_Os09g24480	Os09g0410500	Floral organ formation.	rep1	Morphological trait
LOC_Os09g31310	Os09g0488000	Root length.	gna1	Morphological trait
LOC_Os10g28330	Os10g0419200	Flowering time independent of day length. Panicle size.	ehd2	Morphological trait
LOC_Os10g42690	Os10g0577600	Number and morphology of floral organ.	jmj6	Morphological trait
LOC_Os11g29840	Os11g0490600	Tiller angle. Shoot gravitropism. Polar auxin transport.	lazy1	Morphological trait
LOC_Os11g32110	Os11g0523800	Root length. Shoot length. Brassinosteroid sensitivity.	osarf1	Morphological trait
LOC_Os11g32510	Os11g0528700	Tillering dwarf. Leaf angel. Drought tolerance. Auxin catabolism.	tld1-D	Morphological trait
LOC_Os11g38270	Os11g0595400	Floral organ number. Floral meristem size.	fon2	Morphological trait
LOC_Os12g10540	Os12g0207000	Ovule identity.	OsMADS13	Morphological trait
LOC_Os12g36890	Os12g0555600	Cell wall component. Narrowed leaf. Dwarfism.	nd1	Morphological trait
LOC_Os01g10110	Os01g0197700	Grain number. Cytokinin catabolism.	Gn1a	Morphological trait
LOC_Os01g44260	Os01g0633500	Pericarp color. Proanthocyanidin biosynthesis.	Rd	Morphological trait
LOC_Os04g33740	Os04g0413500	Grain filling. Grain size.	GIF1	Morphological trait
LOC_Os05g06660	Os05g0158500	Grain size.	GS5	Morphological trait
LOC_Os01g57610	Os01g0785400	"Auxin content. Cell elongation. Resistance to infection of Magnaporthe grisea strains."	OsGH3.1	Morphological trait
LOC_Os02g44990	Os02g0671100	Seed germination. ABA sensitivity. Root growth.	MAIF1	Morphological trait
LOC_Os02g49370	Os02g0725700	Dwarfism. Leaf angle. Floral organ formation	OsHAP3E	Morphological trait
LOC_Os03g51690	Os03g0727000	Knotted leaf.	OSH1	Morphological trait
LOC_Os03g56110	Os03g0771500	Ligule formation.	OSH43	Morphological trait
LOC_Os03g59570	Os03g0810100	Tiller growth. Root development. Cytokinin biosynthesis.	OsIPT4	Morphological trait
LOC_Os06g12210	Os06g0226500	Leaf angle. Grain size. Brassinosteroid sensitivity.	bu1	Morphological trait
LOC_Os03g40020	Os03g0597200	Albino leaves before the three-leaf stage	ysa	Morphological trait
LOC_Os03g51030	Os03g0719800	Leaf sheath elongation during seedling stage. Gibberellin metabolism.	phyA	Morphological trait
LOC_Os03g51230	Os03g0722400	"Dwarfism, DNA methylation"	OsDDM1b	Morphological trait
LOC_Os04g46980	Os04g0556500	Dwarfism. Leaf senescence. Crown root.	cZOGT1	Morphological trait
LOC_Os04g46990	Os04g0556600	Dwarfism. Leaf senescence. Crown root.	cZOGT2	Morphological trait
LOC_Os07g31450	Os07g0497100	Dwarfism. Narrowed leaf. Panicle branching. Chlorophyll content. Chromatin modification.	chr729	Morphological trait
LOC_Os08g41940	Os08g0531600	Grain size.	qGW8	Morphological trait
LOC_Os09g32540	Os09g0502100	Growth retardation. Tiller number. Panicle length.	LGD1	Morphological trait
LOC_Os03g13400	Os03g0237250	Tiller angle. Leaf angle. Shoot gravitropism.	LPA1	Morphological trait
LOC_Os06g04690	Os06g0138700	Dwarfism. Floral organ formation.	DDF1	Morphological trait
LOC_Os05g05240	Os05g0144400	Grain length.	OsPPKL2	Morphological trait
LOC_Os08g04290	Os08g0137250	Dwarfism. Floral organ formation.	FIE1	Morphological trait
LOC_Os12g27994	Os12g0465700	Phyllotaxy. Sensitivity to Cytokinin.	DEC	Morphological trait
LOC_Os04g47860	Os04g0566400	Ammonium dependent root development.	OsIDD10	Morphological trait
LOC_Os06g09660	Os06g0196700	Auxin response in roots. Phosphate starvation tolerance.	OsARF16	Morphological trait
LOC_Os03g57240	Os03g0786400	Plant height. Panicle size.	reg1	Morphological trait
LOC_Os10g03400	Os10g0122600	Root hair development.	OsSNDP1	Morphological trait
LOC_Os02g12790	Os02g0220400	Dwarfism. Tillering. Chlorophyll content. Grain filling rate.	Cga1	Morphological trait
LOC_Os05g02530	Os05g0116100	Photosynthetic capacity. Root development. Culm length. Grain number.	OsDHAR1	Morphological trait
LOC_Os04g31070	Os04g0379900	Lateral root development.	SLL1	Morphological trait
LOC_Os06g41850	Os06g0623700	Grain size. Grain yield.	TGW6	Morphological trait
LOC_Os07g41240	Os07g0603700	Embryo/endosperm size	GE	Morphological trait
LOC_Os05g13940	Os05g0227600	Root growth. Root cell elongation. ABA sensitivity.	RePRP1.2	Morphological trait
LOC_Os04g28280	Os04g0350700	Awn formation. Grain length. Grain number.	An-1	Morphological trait
LOC_Os01g54810	Os01g0751600	Tillering. Pollen development.	this1	Morphological trait
LOC_Os09g13630	Os09g0306800	dwarfism	OsEMF2b	Morphological trait
LOC_Os12g41680	Os12g0610600	"leaf rolling, wilting during drought stress"	OMTN3	Morphological trait
LOC_Os01g42850	Os01g0614900	"delay of anther development, pollen maturation, larger spikelets"	OsATG7	Morphological trait
LOC_Os05g06480	Os05g0156900	grain chalkiness	chalk5	Morphological trait
LOC_Os05g32270	Os05g0389000	"organ size control, small organs and overall plant architecture by increasing cell number and reduced cell size"	smos1	Morphological trait
LOC_Os01g47710	Os01g0667400	"internode elongation, cell division and elongation, tiller growth"	DWT1	Morphological trait
LOC_Os01g43650	Os01g0626400	plant height through control of cell size	DIF1	Morphological trait
LOC_Os06g39650	Os06g0597500	elongation of pedicels and secondary branches via GA pathway	sped1	Morphological trait
LOC_Os02g26430	Os02g0462800	"promotion of leaf senescence through ROS accumulation, plant death"	OsWRKY42	Morphological trait
LOC_Os03g15780	Os03g0264400	Tryptophan content in seed and shoot.	OASA2	Physiological trait
LOC_Os05g50410	Os05g0580500	Germ cell development. Meiosis.	OsRAD21-4	Physiological trait
LOC_Os06g12450	Os06g0229800	Chalky kernel. Amylose content.	SSIIa	Physiological trait
LOC_Os08g09230	Os08g0191433	Chalky kernel. Amylose content.	SSIIIa	Physiological trait
LOC_Os08g16610	Os08g0266700	Pollen development. Pollen meiosis.	OsRAD21-3	Physiological trait
LOC_Os09g36910	Os09g0540800	Flowering time.	OsFD1	Physiological trait
LOC_Os10g25030	Os10g0389200	Lesion mimic. Leaf senescence.	OsRCCR1	Physiological trait
LOC_Os10g38060	Os10g0524400	Sensitivity to ABA during germination stage.	PLDβ1	Physiological trait
LOC_Os12g04980	Os12g0143800	Pollen sterility. Homologous pairing.	OsDMC1	Physiological trait
LOC_Os12g17600	Os12g0274700	Rubisco content. Photosynthetic capacity.	rbcS	Physiological trait
LOC_Os12g19470	Os12g0292400	Rubisco content.	OsRBCS4	Physiological trait
LOC_Os12g28750	Os12g0472500	Control of sporocyte number in ovule.	OsTDL1A	Physiological trait
LOC_Os12g42760	Os12g0622500	Male meiosis.	OsSpo11-4	Physiological trait
LOC_Os01g09620	Os01g0192000	Leaf senescence. JA sensitivity.	OsDOS	Physiological trait
LOC_Os01g12710	Os01g0227100	Chlorophyll degradation during senescence.	nyc1	Physiological trait
LOC_Os01g55690	Os01g0762500	Seed glutelin quality.	glu4a	Physiological trait
LOC_Os02g39710	Os02g0610500	Flowering time independent of day length.	OsCOL4	Physiological trait
LOC_Os02g57190	Os02g0816900	Male sterility under short day condition.	osmyoXIB	Physiological trait
LOC_Os03g52760	Os03g0737701	Seed phytic acid content.	lpaN15-186	Physiological trait
LOC_Os04g08740	Os04g0169100	Flowering time. Ethylene sensitivity. Stem starch content.	etr2	Physiological trait
LOC_Os06g02580	Os06g0116400	Chloroplast biosynthesis.	zn	Physiological trait
LOC_Os06g06560	Os06g0160700	Seed amylopectin content.	OsSSI	Physiological trait
LOC_Os06g07210	Os06g0168600	Chloroplast development during seedling stage.	v3	Physiological trait
LOC_Os08g01420	Os08g0105000	Flowering time under long day condition.	ehd3	Physiological trait
LOC_Os08g02380	Os08g0117000	Pollen fertility. Anther dehiscence.	pss1	Physiological trait
LOC_Os08g03682	Os08g0131100	Pollen development. Exine formation.	cyp703a3	Physiological trait
LOC_Os09g36200	Os09g0532000	Leaf senescence. Chlorophyll degradation.	sgr	Physiological trait
LOC_Os10g33250	Os10g0471100	Pollen development. Cuticle and wax production in anther wall.	wda1	Physiological trait
LOC_Os03g01320	Os03g0103300	Cold tolerance at germination stage.	qLTG3?1	Physiological trait
LOC_Os06g16370	Os06g0275000	Flowering time.	Hd1	Physiological trait
LOC_Os08g07740	Os08g0174500	Flowering time under long day condition.	DTH8	Physiological trait
LOC_Os10g35436	Os10g0497300	Boro II cytoplasmic male sterility.	RF1A	Physiological trait
LOC_Os10g35440	Os10g0497432	Boro II cytoplasmic male sterility.	Rf-1	Physiological trait
LOC_Os10g35640	Os10g0499500	Boro II cytoplasmic male sterility.	RF1B	Physiological trait
LOC_Os05g32710	Os05g0393700	Seed starch content.	OsISA2	Physiological trait
LOC_Os08g40930	Os08g0520900	Seed starch content.	OsISA1	Physiological trait
LOC_Os01g43040	Os01g0617600	Carbon and nitrogen content.	OsAAT5	Physiological trait
LOC_Os02g28970	Os02g0491300	Pollen development.	MTR1	Physiological trait
LOC_Os06g41050	Os06g0613400	Synaptonemal complex formation. Homologous pairing.	OsCOM1	Physiological trait
LOC_Os10g03850	Os10g0127900	Glucose-induced suppression of seed germination.	OsFbx352	Physiological trait
LOC_Os02g04840	Os02g0141300	Pollen development.	CAP1	Physiological trait
LOC_Os03g21060	Os03g0327800	Leaf senescence at the grain-filling stage.	OsNAP	Physiological trait
LOC_Os04g12540	Os04g0201900	Germination rate. Resistance to Magnaporthe oryzae and Xanthomonas oryzae pv. oryzae. Brown planthopper resistance.	OslecRK	Physiological trait
LOC_Os05g40180	Os05g0480000	Photosystem II repair during high light HL illumination.	OsSTN8	Physiological trait
LOC_Os05g41090	Os05g0489900	"CH4 oxidation, N2 fixation activation"	OsCCaMK	Physiological trait
LOC_Os05g48200	Os05g0555600	assimilation of the ammonium	OsGOGAT2	Physiological trait
LOC_Os11g10480	Os11g0210300	"sucrose synthesis, germination and survival rate during submergence"	ADH1	Physiological trait
LOC_Os06g08670	Os06g0185900	regeneration fail	OsGPX4	Physiological trait
LOC_Os03g18360	Os03g0294700	spikelet fertility	OsETOL1	Physiological trait
LOC_Os12g08780	Os12g0189500	DNA methylation and maternal H3K27me3	OsYUCCA11	Physiological trait
LOC_Os11g36470	Os11g0573000	DNA hypomethylation	-	Physiological trait
LOC_Os06g40120	Os06g0603600	Pi-dependent inhibitor of Phosphate starvation response regulator 2 (PHR2)	SPK1(SYG1)	Physiological trait
LOC_Os11g16550	Os11g0267000	chlorophyll and carotenoid metabolism via methylation	OsGUN4	Physiological trait
LOC_Os04g52900	Os04g0620000	Arsenic (As) accumulation in grain	OsABCC1	Physiological trait
LOC_Os02g30630	Os02g0510200	Bispyribac sodium resistance.	ALS	Resistance or Tolerance
LOC_Os01g60020	Os01g0816100	Bacterial blight resistance. HR cell death.	OsNAC4	Resistance or Tolerance
LOC_Os04g10160	Os04g0180400	Production phytoalexins and allelochemicals.	CYP99A2	Resistance or Tolerance
LOC_Os05g02750	Os05g0119000	Aluminium tolerance.	STAR2	Resistance or Tolerance
LOC_Os06g40170	Os06g0604200	Resistance to rice striped stem borer and rice brown planthopper.	OsPLD伪4	Resistance or Tolerance
LOC_Os06g40180	Os06g0604300	Resistance to rice striped stem borer and rice brown planthopper.	OsPLD伪5	Resistance or Tolerance
LOC_Os07g34570	Os07g0529600	Thiamine mediated resistance to Xanthomonas oryzae and Magnaporthe grisea.	OsDR8	Resistance or Tolerance
LOC_Os08g04440	Os08g0139000	High-light and cold tolerance.	OsDEG10	Resistance or Tolerance
LOC_Os08g08970	Os08g0189200	Resistance to Magnaporthe oryzae and Rhizoctonia solani.	OsGLP8	Resistance or Tolerance
LOC_Os08g45000	Os08g0564000	Phosphate uptake and translocation.	OsPT6	Resistance or Tolerance
LOC_Os09g34250	Os09g0518200	Probenazole dependent blast resistance.	OsSGT1	Resistance or Tolerance
LOC_Os01g09800	Os01g0194300	Benzothiadiazole (BTH)-induced blast resistance.	OsNPR1	Resistance or Tolerance
LOC_Os05g25770	Os05g0322900	"Cold, drought and salinity tolerance. ABA sensitivity."	OsWRKY45	Resistance or Tolerance
LOC_Os01g45200	Os01g0639200	NH1-mediated resistance to Xanthomonas oryzae pv. oryzae. Lignin content. Sugar extractability for the production of cellulosic biofuels.	snl6	Resistance or Tolerance
LOC_Os02g50970	Os02g0743500	Drought tolerance during seedling stage. Oxidative stress resistance.	dsm1	Resistance or Tolerance
LOC_Os03g03370	Os03g0125100	Drought and oxidative stress tolerance.	dsm2	Resistance or Tolerance
LOC_Os05g39560	Os05g0472700	Zn sensitivity.	oszip5	Resistance or Tolerance
LOC_Os09g23640	Os09g0401100	Mycorrhizal arbuscule formation.	STR1	Resistance or Tolerance
LOC_Os10g11980	Os10g0195600	Spotted leaf. Resistance to Magnaporthe grisea and Xanthomonas oryzae pv oryzae.	OsAT1/Spl18	Resistance or Tolerance
LOC_Os01g57310	Os01g0781700	Blast resistance.	Pi37	Resistance or Tolerance
LOC_Os04g32850	Os04g0401000	Resistance to Magnaporthe oryzae.	Pi21	Resistance or Tolerance
LOC_Os06g22460	Os06g0330100	Resistance to Magnaporthe oryzae.	Pi25	Resistance or Tolerance
LOC_Os06g39760	Os06g0598900	Resistance to Xanthomonas oryzae pv. oryzae.	Xa27	Resistance or Tolerance
LOC_Os09g15840	Os09g0327600	Resistance to Magnaporthe oryzae.	Pi5-1	Resistance or Tolerance
LOC_Os11g11790	Os11g0225100	Resistance to Magnaporthe oryzae carrying AVR-Pia	Pia	Resistance or Tolerance
LOC_Os11g11810	Os11g0225300	Resistance to Magnaporthe oryzae carrying AVR-Pia	Pia	Resistance or Tolerance
LOC_Os11g35500	Os11g0559200	Bacterial blight resistance.	Xa21	Resistance or Tolerance
LOC_Os11g46080	Os11g0687900	Blast resistance.	Pik2	Resistance or Tolerance
LOC_Os11g46200	Os11g0689000	Blast resistance.	Pikm	Resistance or Tolerance
LOC_Os11g46210	Os11g0689100	Blast resistance.	Pik-p	Resistance or Tolerance
LOC_Os01g08330	Os01g0178600	Bacterial blight and blast resistance.	OsCDR1	Resistance or Tolerance
LOC_Os02g12680	Os02g0218700	White-backed planthopper induced resistance to bacterial blight.	OsHPL2	Resistance or Tolerance
LOC_Os03g13970	Os03g0243300	Canavanine resistance.	RPN10	Resistance or Tolerance
LOC_Os05g44210	Os05g0518600	"Cold, drought and salinity tolerance."	OsTPS1	Resistance or Tolerance
LOC_Os06g03670	Os06g0127100	"Cold, drought and salinity tolerance."	OsDREB1C	Resistance or Tolerance
LOC_Os06g09370	Os06g0193400	Phosphate starvation tolerance.	OsPTF1	Resistance or Tolerance
LOC_Os06g44180	Os06g0651100	"Resistance to Magnaporthe grise. Salinity, hydrogen peroxide and UV tolerance."	YK1	Resistance or Tolerance
LOC_Os07g31540	Os07g0498800	Cold tolerance.	CrtintP1	Resistance or Tolerance
LOC_Os08g10630	Os08g0207500	Zn transport.	OsZIP4	Resistance or Tolerance
LOC_Os09g34060	Os09g0516200	Rice tungro disease resistance.	RF2a	Resistance or Tolerance
LOC_Os09g35010	Os09g0522000	"Cold, drought and salinity tolerance."	OsDREB1B	Resistance or Tolerance
LOC_Os09g35030	Os09g0522200	"Cold, drought and salinity tolerance."	OsDREB1A	Resistance or Tolerance
LOC_Os02g02000	Os02g0110200	"Lesion mimic. Resistance to rice brown planthopper, rice striped stem borer and Xanthomonas oryzae pv. oryzae."	OsHPL3	Resistance or Tolerance
LOC_Os03g20090	Os03g0315400	"Cold, drought and salinity tolerance. ABA sensitivity."	OsMYB2	Resistance or Tolerance
LOC_Os03g20680	Os03g0322900	Drought and salinity tolerance.	OsLEA3-2	Resistance or Tolerance
LOC_Os09g32080	Os09g0494200	Brittle culm. Cellulose content.	BC15/OsCTL1	Resistance or Tolerance
LOC_Os09g37540	Os09g0547500	Resistance to reactive oxygen species.	OsLDC-like 1	Resistance or Tolerance
LOC_Os03g44150	Os03g0643300	Drought and osmotic stress tolerance.	OsOAT	Resistance or Tolerance
LOC_Os04g10800	Os04g0186800	Mycorrhizal symbiosis.	PT13	Resistance or Tolerance
LOC_Os12g32400	Os12g0508500	Fe translocation. Growth retardation.	OsbHLH133	Resistance or Tolerance
LOC_Os08g43334	Os08g0546800	Drought and salinity tolerance.	OsHsfB2b	Resistance or Tolerance
LOC_Os04g46940	Os04g0556000	Cu translocation.	OsHMA5	Resistance or Tolerance
LOC_Os03g57450	Os03g0788500	Resistance to Magnaporthe grisea.	OsCPK10	Resistance or Tolerance
LOC_Os10g40100	Os10g0548700	promote invasion of bacteria (Xoc)	NRRB	Resistance or Tolerance
LOC_Os01g58290	Os01g0795400	activate Hwi1-perceived downstream defense responses	Hwi2	Resistance or Tolerance
LOC_Os01g48060	Os01g0670800	awn development	OsETT2	Resistance or Tolerance
LOC_Os09g23650	Os09g0401300	regulation of JA-induced accumulation of linalool and role in resistance to Xoo	OsJAZ8	Resistance or Tolerance
LOC_Os10g09820	Os10g0177000	enhanced blast resistance	OsNAC111	Resistance or Tolerance
LOC_Os02g04630	Os02g0138900	salinity tolerance	OsCAX4	Resistance or Tolerance
LOC_Os11g04460	Os11g0140400	salinity tolerance	OsACA4	Resistance or Tolerance
LOC_Os06g06090	Os06g0154500	Regulation of stress response genes.	OsMAPK6	Others
LOC_Os06g39470	Os06g0595800	Ester-linked ferulate content in cell walls.	AFT	Others
LOC_Os10g34430	Os10g0485600	Processing of 24-nucleotide phased small RNA.	OsDCL3b	Others
LOC_Os12g17080	Os12g0270200	Growth retardation. RNA editing in mitochondria.	ogr1	Others
LOC_Os01g25484	Os01g0357100	Shoot regeneration. Nitrate assimilation.	PSR	Others
LOC_Os04g47059	Os04g0557500	Purple leaf. Anthocyanin biosynthesis.	OSB2	Others
LOC_Os04g47080	Os04g0557800	Purple leaf. Anthocyanin biosynthesis.	OSB1	Others
LOC_Os02g50480	Os02g0738400	Cytokinin-dependent green pigmentation in calli.	OsHk6	Others
LOC_Os04g35420	Os04g0433800	Processing of double-strand break sites.	OsRecQl4	Others
LOC_Os01g56940	Os01g0777300	Processing of double-strand break sites.	OsExo1	Others

## Sheet: S6
Table S6. GO terms of specific homologous mutant genes with known function in HD11 compared with ATR
GO term	Ontology	Description	Number in input list	Number in BG/Ref	p-value
GO:0006259	P	DNA metabolic process	1404	4515	3.9e-17
GO:0006278	P	RNA-dependent DNA replication	908	2826	2e-13
GO:0006260	P	DNA replication	925	2898	4e-13
GO:0012501	P	programmed cell death	227	532	1e-11
GO:0006915	P	apoptosis	227	532	1e-11
GO:0008219	P	cell death	228	544	3.5e-11
GO:0016265	P	death	228	544	3.5e-11
GO:0015074	P	DNA integration	970	3168	2.2e-10
GO:0006139	P	nucleobase, nucleoside, nucleotide and nucleic acid metabolic process	1887	6695	8.9e-10
GO:0006952	P	defense response	188	452	2.9e-09
GO:0006807	P	nitrogen compound metabolic process	1957	7073	4.4e-08
GO:0044260	P	cellular macromolecule metabolic process	2526	9350	9.2e-08
GO:0043170	P	macromolecule metabolic process	2779	10433	7.3e-07
GO:0006468	P	protein amino acid phosphorylation	477	1570	2.6e-05
GO:0016740	F	transferase activity	1839	6190	2.6e-16
GO:0016772	F	transferase activity, transferring phosphorus-containing groups	1452	4781	7e-15
GO:0003964	F	RNA-directed DNA polymerase activity	908	2826	2e-13
GO:0034061	F	DNA polymerase activity	913	2851	3.2e-13
GO:0016779	F	nucleotidyltransferase activity	937	2981	4.8e-12
GO:0005488	F	binding	4404	16823	2.2e-11
GO:0003723	F	RNA binding	966	3190	1.6e-09
GO:0003676	F	nucleic acid binding	2273	8251	4e-09
GO:0032559	F	adenyl ribonucleotide binding	917	3087	8.6e-08
GO:0005524	F	ATP binding	915	3085	1.1e-07
GO:0001883	F	purine nucleoside binding	957	3247	1.3e-07
GO:0030554	F	adenyl nucleotide binding	957	3247	1.3e-07
GO:0001882	F	nucleoside binding	958	3257	1.8e-07
GO:0003824	F	catalytic activity	3334	12724	2.4e-06
GO:0003677	F	DNA binding	1400	5059	9.9e-06
GO:0032555	F	purine ribonucleotide binding	939	3292	1.4e-05
GO:0032553	F	ribonucleotide binding	939	3292	1.4e-05
GO:0017076	F	purine nucleotide binding	980	3456	1.9e-05
GO:0004672	F	protein kinase activity	477	1575	3.4e-05
GO:0004674	F	protein serine/threonine kinase activity	449	1478	4.6e-05
GO:0004497	F	monooxygenase activity	161	458	8.5e-05
GO:0016773	F	phosphotransferase activity, alcohol group as acceptor	511	1726	0.00011
GO:0004523	F	ribonuclease H activity	365	1194	0.00016
GO:0016891	F	endoribonuclease activity, producing 5'-phosphomonoesters	369	1210	0.00017
GO:0016893	F	endonuclease activity, active with either ribo- or deoxyribonucleic acids and producing 5'-phosphomonoesters	369	1214	0.00021
GO:0004521	F	endoribonuclease activity	371	1221	0.00021
GO:0004540	F	ribonuclease activity	376	1241	0.00022
GO:0000166	F	nucleotide binding	1068	3874	0.00024
GO:0005529	F	sugar binding	68	166	0.00041
GO:0004519	F	endonuclease activity	376	1253	0.0004
GO:0016301	F	kinase activity	507	1750	0.00056
GO:0004518	F	nuclease activity	395	1337	0.00074

## Sheet: S7
Table S7. GO terms of specific homologous mutant genes with known function in HD11 compared with NTR
GO term	Ontology	Description	Number in input list	Number in BG/Ref	p-value
GO:0016070	P	RNA metabolic process	216	1088	2.2e-05
GO:0010556	P	regulation of macromolecule biosynthetic process	296	1564	1.8e-05
GO:0045449	P	regulation of transcription	287	1513	2.1e-05
GO:0019219	P	regulation of nucleobase, nucleoside, nucleotide and nucleic acid metabolic process	287	1520	2.8e-05
GO:0009889	P	regulation of biosynthetic process	296	1564	1.8e-05
GO:0019222	P	regulation of metabolic process	311	1664	2.6e-05
GO:0006350	P	transcription	306	1629	2.2e-05
GO:0051171	P	regulation of nitrogen compound metabolic process	287	1520	2.8e-05
GO:0080090	P	regulation of primary metabolic process	307	1626	1.5e-05
GO:0060255	P	regulation of macromolecule metabolic process	309	1640	1.6e-05
GO:0031326	P	regulation of cellular biosynthetic process	296	1564	1.8e-05
GO:0010468	P	regulation of gene expression	298	1577	1.9e-05
GO:0031323	P	regulation of cellular metabolic process	298	1593	3.6e-05
GO:0050789	P	regulation of biological process	360	2027	0.00021
GO:0065007	P	biological regulation	375	2125	0.00024
GO:0050794	P	regulation of cellular process	347	1955	0.00029
GO:0005515	F	protein binding	471	2460	1.3e-08
GO:0000166	F	nucleotide binding	656	3874	6.7e-05
GO:0017076	F	purine nucleotide binding	593	3456	4.8e-05
GO:0032555	F	purine ribonucleotide binding	568	3292	4.3e-05
GO:0032559	F	adenyl ribonucleotide binding	534	3087	6.1e-05
GO:0032553	F	ribonucleotide binding	568	3292	4.3e-05
GO:0001883	F	purine nucleoside binding	559	3247	6.2e-05
GO:0005524	F	ATP binding	534	3085	5.8e-05
GO:0030554	F	adenyl nucleotide binding	559	3247	6.2e-05
GO:0001882	F	nucleoside binding	559	3257	8.1e-05

## Sheet: S8
Table S8. Specific homologous mutant genes with known function in HD11 compared with NTR
MSU_ID	RAP ID	Alt_Allele_Function	Gene	Category
LOC_Os02g05980	Os02g0154200	decreasing yield	LRK1	Yield components
LOC_Os02g17380	Os02g0274000	fertility restoration	Rf2	Yield components
LOC_Os02g47280	Os02g0701300	larger grain size and higher nitrogen use efficiency	GRF4	Yield components
LOC_Os03g08470	Os03g0183000	increasing grain length	OsLG3	Yield components
LOC_Os03g30420	Os03g0417700	deceasing grain length	GL3.2	Yield components
LOC_Os03g44500	Os03g0646900	increasing grain length	GL3.1	Yield components
LOC_Os03g49350	Os03g0700400	decreasing generation of stale flavor	LOX-3	Yield components
LOC_Os04g32350	Os04g0394500	hybrid incompatibility	DGS1	Yield components
LOC_Os05g05280	Os05g0145000	increasing setting rate	PTB1	Yield components
LOC_Os07g32170	Os07g0505200	increasing grain size	OsSPL13	Yield components
LOC_Os01g69850	Os01g0922800	delaying heading date	OsMADS51	Heading date
LOC_Os02g49230	Os02g0724000	delaying heading date under LD	Hd7	Heading date
LOC_Os03g02160	Os03g0112700	delaying heading date	Ehd4	Heading date
LOC_Os03g03070	Os03g0122600	delaying heading date	OsMADS50	Heading date
LOC_Os03g57940	Os03g0793500	promoting heading date under LD	Hd16	Heading date
LOC_Os06g05060	Os06g0142600	delaying heading date	Hd17	Heading date
LOC_Os10g32600	Os10g0463400	delaying heading date	Ehd1	Heading date
LOC_Os03g49880	Os03g0706500	increasing lodging resistance	OsTB1	Plant Architecture
LOC_Os03g49990	Os03g0707600	higher plant height	SLR1	Plant Architecture
LOC_Os09g26999	Os09g0441900	erect panicle and decreasing plant height	DEP1	Plant Architecture
LOC_Os06g44750	Os06g0657500	increasing grain weight and plant height	HL6	Seed Morphology
LOC_Os01g55940	Os01g0764800	increasing blight resistance	GH3-2	Biotic Stress
LOC_Os06g01860	Os06g0107800	increasing brown planthopper resistance	BPH29	Biotic Stress
LOC_Os12g18360	Os12g0281300	increasing blast resistance	Pi-ta	Biotic Stress
LOC_Os01g20160	Os01g0307500	increasing salt tolerance	SKC1	Abiotic Stress
LOC_Os03g02380	Os03g0114800	cadmium accumulation	OsCd1	Abiotic Stress
LOC_Os04g04330	Os04g0132500	increasing chilling tolerance	CTB4a	Abiotic Stress
LOC_Os06g48810	Os06g0701700	lower potassium use efficiency	OsHKT2;1	Abiotic Stress
LOC_Os09g20390	Os09g0369400	increasing anaerobic germination tolerance	OsTPP7	Abiotic Stress
LOC_Os10g08580	Os10g0167600	decreasing UV-B tolerance	qUVR-10	Abiotic Stress
LOC_Os10g31850	Os10g0456800	increasing drought tolerance	DCA1	Abiotic Stress
LOC_Os01g70220	Os01g0927000	Glabrous. DNA methylation.	SDG714	Morphological trait
LOC_Os02g12350	Os02g0214900	Elongated uppermost internode. Fertility. Grain size. Awn development.	HDA703	Morphological trait
LOC_Os02g15700	Os02g0256200	Dwarfism.	OsHARP	Morphological trait
LOC_Os02g41550	Os02g0625000	Blue light mediated de-etiolation and seedling growth. Flowering time independent of daylength .	Oscry2	Morphological trait
LOC_Os03g08754	Os03g0186600	Primary root elongation. Coleoptile elongation. Leaf angle. Brassinosteroid sensitivity.	OsMDP1	Morphological trait
LOC_Os06g38470	Os06g0583400	Elongated uppermost internode. Fertility.	HDA702	Morphological trait
LOC_Os06g49080	Os06g0704300	Dwarfism. Leaf angle. Tillering.	OsLIC	Morphological trait
LOC_Os09g32948	Os09g0507200	Floral organ formation.	OsMADS8	Morphological trait
LOC_Os02g52710	Os02g0765600	Starch degradation. Seed germination. Seedling growth.	AmyI-1	Morphological trait
LOC_Os05g39990	Os05g0477600	Dwarfism. Cell wall extensibility. Flowering time.	OsEXP4	Morphological trait
LOC_Os11g47970	Os11g0707000	Dwarfism.	OsrcaA1	Morphological trait
LOC_Os01g33040	Os01g0513900	Organ development and growth.	dbs1	Morphological trait
LOC_Os01g50770	Os01g0703600	"Spotted leaf. Bacterial blight and blast resistance. Chlorophyll content. Soluble protein content. Photosystem II efficiency. Concentrations of reactive oxygen species, phytoalexin, callose, and autofluorescent phenolic compounds."	spl28*	Morphological trait
LOC_Os02g02860	Os02g0121000	Chlorophyll content.	cde1(t)	Morphological trait
LOC_Os02g05840	Os02g0152500	Leaf angle. Cell division in lamina joint.	lc2	Morphological trait
LOC_Os02g14120	Os02g0236100	Development of root outer cell layers.	Docs1	Morphological trait
LOC_Os02g15950	Os02g0260200	Erect panicle.	ep3	Morphological trait
LOC_Os02g17780	Os02g0278700	Dwarfism. Gibberellin biosynthesis.	oscps1	Morphological trait
LOC_Os02g45250	Os02g0674800	Leaf rolling. Bulliform cell size and number.	oul1	Morphological trait
LOC_Os02g50240	Os02g0735200	Dwarfism. Growth retardation.	Osgs1;1	Morphological trait
LOC_Os03g08360	Os03g0181500	Shoot organization.	oni1	Morphological trait
LOC_Os03g19080	Os03g0302900	Dwarfism. Cell division and expansion.	ssd1	Morphological trait
LOC_Os03g43400	Os03g0633500	Lateral root development.	OsIAA11	Morphological trait
LOC_Os03g55090	Os03g0758100	Seed starch content. Grain maturation.	pho1	Morphological trait
LOC_Os04g49570	Os04g0585200	Root development. Maintainance of root apical meristem.	glr3.1	Morphological trait
LOC_Os04g55230	Os04g0645100	Seed starch and protein content. Grain size.	flo2	Morphological trait
LOC_Os05g02500	Os05g0115800	Dwarfism. Gibberellin and brassinosteroid sensitivity.	OsMKP1	Morphological trait
LOC_Os05g45420	Os05g0530500	Seed germination. Seedling growth.	snrk1a	Morphological trait
LOC_Os06g49840	Os06g0712700	Floral organ formation.	spw1	Morphological trait
LOC_Os06g50340	Os06g0717200	Floral organ number. Floral meristem size.	fon1	Morphological trait
LOC_Os07g48430	Os07g0682800	Root hair formation.	rth1	Morphological trait
LOC_Os10g25780	Os10g0397400	Internode elongation. Leaf angle. Brassinosteroid sensitivity.	brd2	Morphological trait
LOC_Os10g26340	Os10g0403000	Plastochron and phyllotaxy. Dwarfism.	pla1	Morphological trait
LOC_Os10g32980	Os10g0467800	Brittle culm. Secondary cell wall synthesis.	OsCesA7	Morphological trait
LOC_Os10g42750	Os10g0578200	Root hair development.	OsCSLD1	Morphological trait
LOC_Os11g12740	Os11g0235200	Panicle elongation. Grain size.	sp1	Morphological trait
LOC_Os01g08320	Os01g0178500	Dwarfism. Leaf angle. Root length.	OsIAA1	Morphological trait
LOC_Os01g29150	Os01g0388000	Brassinosteroid catabolism. Dwarfism. Abnormal leaf morphology.	CYP734A6	Morphological trait
LOC_Os03g20790	Os03g0324300	Dwarfism. Root length. Ethylene sensitivity.	OsEIL1	Morphological trait
LOC_Os03g24240	Os03g0356900	Tiller growth. Root development. Cytokinin biosynthesis.	OsIPT2	Morphological trait
LOC_Os03g24440	Os03g0358900	Tiller growth. Root development. Cytokinin biosynthesis.	OsIPT1	Morphological trait
LOC_Os04g57720	Os04g0673300	Dwarfism. Root development. Cytokinin metabolism.	OsRR6	Morphological trait
LOC_Os05g03884	Os05g0129700	Shoot organization. Leaf morphology.	OSH71	Morphological trait
LOC_Os05g47840	Os05g0551700	Tiller growth. Root development. Cytokinin biosynthesis.	OsIPT7	Morphological trait
LOC_Os06g41010	Os06g0612800	"Cold, drought and salinity tolerance during germination and seedling stage. Drought and salinity tolerance during anthesis stage."	OsiSAP8	Morphological trait
LOC_Os10g33310	Os10g0471700	Internode elongation. Pollen viability. Stomata size. Leaf rolling.	OsiICK6	Morphological trait
LOC_Os02g07430	Os02g0170300	Seed amylose content. Grain filling.	MADS29	Morphological trait
LOC_Os04g55560	Os04g0649100	Seed shattering. Floral organ identity.	shat1	Morphological trait
LOC_Os03g48740	Os03g0693600	Dwarfism. Tillering. Auxin catabolism.	OsIAGLU	Morphological trait
LOC_Os12g42310	Os12g0617900	Grain length.	OsPPKL3	Morphological trait
LOC_Os03g03660	Os03g0128700	Drought tolerance. Seedling elongation. Grain size.	OsCDPK1	Morphological trait
LOC_Os08g04270	Os08g0137100	Grain size. Grain filling rate. Seed dormancy.	OsFIE2	Morphological trait
LOC_Os06g49250	Os06g0706400	Ammonium uptake. Lateral root formation. Grain size. Panicle size.	OsPTR9	Morphological trait
LOC_Os02g44500	Os02g0664000	Root development. Dwarfism. Hydrogen peroxide homeostasis.	OsGPX3	Morphological trait
LOC_Os09g36680	Os09g0537700	Salinity tolerance. Seedling growth.	OsRNS4	Morphological trait
LOC_Os09g38980	Os09g0563300	"chloroplast development, thermo-sensitivity albino phenotype"	TCD9	Morphological trait
LOC_Os02g39340	Os02g0606000	chlorophyll content and chloroplast development in early seedling stage	OsDG2	Morphological trait
LOC_Os04g57830	Os04g0674500	"open husk, long sterile lemma"	OsmiR396d	Morphological trait
LOC_Os04g46960	Os04g0556300	number of seed per spikelets	OsGPX1	Morphological trait
LOC_Os01g69210	Os01g0921200	"auxin-mediated root development, shortened root (decreased primary root and lateral root elongation and cell division), root hair initiation and elongation, "	OsMOGS	Morphological trait
LOC_Os05g04850	Os05g0140500	"plant height, culm length by controlling internode size"	OsY14a	Morphological trait
LOC_Os04g58620	Os04g0682800	"green and white variegation, plastid formation, chloroplast development"	AM1	Morphological trait
LOC_Os01g70440	Os01g0929600	Pollen development. Anther development.	rtS	Physiological trait
LOC_Os02g15350	Os02g0252400	Seed storage protein and starch content.	RPBF	Physiological trait
LOC_Os02g15594	Os02g0255100	Cytoplasmic male sterility. Pollen development.	DCW11	Physiological trait
LOC_Os03g09250	Os03g0192700	Seed phytic acid content.	RINO1	Physiological trait
LOC_Os03g49510	Os03g0701800	Flowering time.	OsPIPK1	Physiological trait
LOC_Os03g52340	Os03g0733800	Seed storage protein. Disulfide bond formation in endosperm.	ero1	Physiological trait
LOC_Os03g54091	Os03g0752200	Germ cell development. Homologous pairing.	OsSPO11-1	Physiological trait
LOC_Os03g55730	Os03g0766000	Protein body formation in seed.	CysR10	Physiological trait
LOC_Os09g35000	Os09g0521900	Early microspore development.	OsGEN-L	Physiological trait
LOC_Os07g05620	Os07g0150700	Fertility. Salinity tolerance.	OsCIPK23	Physiological trait
LOC_Os11g08210	Os11g0184900	"Cold tolerance. Sensitivity to salt, mannitol and ABA during germination."	OsNAC5	Physiological trait
LOC_Os11g46230	Os11g0689300	Late stage pollen development.	OsPCBP	Physiological trait
LOC_Os01g08700	Os01g0182600	Flowering time.	OsGI	Physiological trait
LOC_Os01g68870	Os01g0917500	Number of male and female sporocytes. Development of pollen mother cells.	msp1	Physiological trait
LOC_Os01g72090	Os01g0949400	Photoperiodic response.	se13	Physiological trait
LOC_Os02g20930	Os02g0313400	Pollen development. Tapetal programmed cell death.	api5	Physiological trait
LOC_Os02g40450	Os02g0617500	Germ cell development. Meiotic crossover formation.	mer3	Physiological trait
LOC_Os02g47360	Os02g0702000	Chlorophyll development. Structure and function of photosystem I.	OSOTP51	Physiological trait
LOC_Os03g45194	Os03g0654600	Leaf senescence. Chlorophyll b and light-harvesting complex II degradation.	nol1	Physiological trait
LOC_Os03g54084	Os03g0752100	Flowering time. Deetiolation response. Sensitivity to red and far-red light.	phyC	Physiological trait
LOC_Os07g10490	Os07g0204900	Pre-harvest sprouting.	OsZDS	Physiological trait
LOC_Os10g26560	Os10g0405500	Germ cell development. Homologous pairing.	pair3	Physiological trait
LOC_Os11g09280	Os11g0199200	Starch biosynthesis.	PDIL1	Physiological trait
LOC_Os02g49060	Os02g0722400	Carbon and nitrogen content.	OsAAT24	Physiological trait
LOC_Os04g45900	Os04g0542800	Sterility. Cu transport.	YSL16	Physiological trait
LOC_Os04g57850	Os04g0674700	Photosynthetic capacity. Stomatal conductance.	SLAC1	Physiological trait
LOC_Os07g32480	Os07g0508500	Meiosis.	BRK1	Physiological trait
LOC_Os06g40550	Os06g0607700	Development of anther cuticle and pollen exine.	PDA1	Physiological trait
LOC_Os01g23620	Os01g0338000	Seed storage protein.Pro-gultelin content in seed. Floury endosperm.	Sar1a	Physiological trait
LOC_Os12g37360	Os12g0560300	Seed storage protein.Pro-gultelin content in seed. Floury endosperm.	Sar1b	Physiological trait
LOC_Os03g29810	Os03g0411500	Chloroplast development.	vyl	Physiological trait
LOC_Os03g56260	Os03g0773600	Flowering time.	NRRa	Physiological trait
LOC_Os03g56270	Os03g0773700	Flowering time.	NRRb	Physiological trait
LOC_Os05g41880	Os05g0498300	Cross over formation during meiosis.	OsMSH5	Physiological trait
LOC_Os01g01484	Os01g0104600	Chloroplast development. Photosynthetic capacity.	OsDET1	Physiological trait
LOC_Os11g05552	Os11g0153600	Chloroplast development.	YGL138(t)	Physiological trait
LOC_Os05g08430	Os05g0176800	Seed setting. Pollen tube growth.	OsBOR4	Physiological trait
LOC_Os10g26940	Os10g0409400	"cell adhesion, resistance to cold, salinity and drought stress"	OsBURP16	Physiological trait
LOC_Os03g48170	Os03g0686900	"starch synthesis in rice endosperm, compound granule formation in rice endosperm, "	FLO6	Physiological trait
LOC_Os03g52860	Os03g0738600	"promoting early seed germination, seed longevity"	OsLOX2 (L-2)	Physiological trait
LOC_Os07g36460	Os07g0549600	"stamen development, posttranscriptional splicing target of the EJC subunit"	OsUDT1	Physiological trait
LOC_Os04g01140	Os04g0101400	biosynthesis of different tricin O-conjugated derivatives	CYP93G1	Physiological trait
LOC_Os01g69030	Os01g0919400	pollen germination through sucrose synthesis	OsSPS1	Physiological trait
LOC_Os02g05480	Os02g0148100	phosphorylates OsbHLH65 in nucleus	OsMPK3	Physiological trait
LOC_Os01g69110	Os01g0920200	DNA methylation	-	Physiological trait
LOC_Os01g07760	Os01g0172400	Salinity tolerance in suspension-cultured cells.	OsPLDβ1	Resistance or Tolerance
LOC_Os03g18070	Os03g0290300	Resistance to Magnaporthe grisea.	OsFAD7	Resistance or Tolerance
LOC_Os04g09920	Os04g0178400	Production phytoalexins and allelochemicals.	CYP99A3	Resistance or Tolerance
LOC_Os05g02130	Os05g0112000	Resistance to Xanthomonas oryzae pv. oryzae.	XB3	Resistance or Tolerance
LOC_Os07g48820	Os07g0687700	Resistance to Xanthomonas oryzae pv. oryzae. Growth retardation.	rtGA2.1	Resistance or Tolerance
LOC_Os11g45740	Os11g0684000	Resistance to brown spot pathogen Cochliobolus miyabeanus.	OsMPK5	Resistance or Tolerance
LOC_Os03g12730	Os03g0228800	Resistance to Magnaporthe oryzae.	OsBRR1	Resistance or Tolerance
LOC_Os03g17700	Os03g0285800	"Resistance to Magnaporthe grisea and Burkholderia glumae. Cold, drought and salinity tolerance."	OsMAPK5	Resistance or Tolerance
LOC_Os03g49380	Os03g0700700	Brown planthopper resistance.	OsLOX1	Resistance or Tolerance
LOC_Os04g20270	Os04g0271000	Oxidative stress resistance. Chromatin modification.	OsSrt1	Resistance or Tolerance
LOC_Os10g30790	Os10g0444700	Phosphate uptake.	OsPT8	Resistance or Tolerance
LOC_Os01g68860	Os01g0917400	Resistance to Xanthomonas oryzae pv. oryzae. JA level.	C3H12	Resistance or Tolerance
LOC_Os01g69010	Os01g0919100	Aluminium tolerance.	OsFRDL4	Resistance or Tolerance
LOC_Os03g02800	Os03g0119966	Rice dwarf virus resistance.	rim1	Resistance or Tolerance
LOC_Os03g11734	Os03g0216700	Translocation of Fe to shoot.	OsFRDL1	Resistance or Tolerance
LOC_Os03g37490	Os03g0571900	Cadmium uptake. Iron uptake.	pez1	Resistance or Tolerance
LOC_Os03g55240	Os03g0760200	Herbicide resistance.	bel	Resistance or Tolerance
LOC_Os05g45410	Os05g0530400	Cadmium tolerance.	OsHsfA4a	Resistance or Tolerance
LOC_Os05g48390	Os05g0557700	Phosphate uptake and translocation.	ltn1	Resistance or Tolerance
LOC_Os06g03580	Os06g0125800	Resistance to Magnaporthe oryzae. Cell wall defense.	osbbi1	Resistance or Tolerance
LOC_Os06g48060	Os06g0695800	Aluminium tolerance.	star1	Resistance or Tolerance
LOC_Os06g48720	Os06g0700700	Zn and Cd translocation.	OsHMA2	Resistance or Tolerance
LOC_Os07g30774	Os07g0490200	Resistance to Xanthomonas oryzae and Magnaporthe grisea.	oscbt	Resistance or Tolerance
LOC_Os11g14380	Os11g0249000	Bacterial blight resistance. Hydrogen peroxide and salicylic acid accumulation.	nls1-1D	Resistance or Tolerance
LOC_Os12g32210	Os12g0506800	Salinity tolerance. Oxidative stress tolerance.	osatg10b	Resistance or Tolerance
LOC_Os03g08310	Os03g0180800	Drought and salinity tolerance.	OsTIFY11a	Resistance or Tolerance
LOC_Os03g53020	Os03g0741100	Drought tolerance.	OsbHLH148	Resistance or Tolerance
LOC_Os04g41160	Os04g0488700	Resistance to Magnaporthe oryzae and Xanthomonas oryzae pv oryzae. Reactive oxygen species sensitivity.	OsOxi1	Resistance or Tolerance
LOC_Os05g30220	Os05g0365300	Resistance to Xanthomonas oryzae pv. oryzicola.	DEPG1	Resistance or Tolerance
LOC_Os05g46480	Os05g0542500	Drought tolerance.	OsLEA3-1	Resistance or Tolerance
LOC_Os06g43660	Os06g0644200	Cold tolerance.	OVP1	Resistance or Tolerance
LOC_Os06g44010	Os06g0649000	Resistance to Xanthomonas oryzae pv. oryzae.	OsWRKY28	Resistance or Tolerance
LOC_Os08g03290	Os08g0126300	Salinity tolerance.	OsGAPC3	Resistance or Tolerance
LOC_Os12g39400	Os12g0583700	Drought and salinity tolerance.	ZFP252	Resistance or Tolerance
LOC_Os01g32660	Os01g0510100	Cold tolerance.	OsMKK6	Resistance or Tolerance
LOC_Os03g46340	Os03g0666200	Chitin elicitor-induced defense response. ROS production.	OsSWAP70A	Resistance or Tolerance
LOC_Os05g48020	Os05g0553700	Resistance to Magnaporthe grisea. Oxidative stress tolerance.	OsSYP71	Resistance or Tolerance
LOC_Os01g70310	Os01g0928000	Salinity tolerance. Regulation of Na and K homeostasis.	OrbHLH001	Resistance or Tolerance
LOC_Os05g47446	Os05g0547850	Salinity tolerance	OsPDCD5	Resistance or Tolerance
LOC_Os09g33810	Os09g0513000	XA21-mediated resistance to Xanthomonas oryzae pv. oryzae	Xb25	Resistance or Tolerance
LOC_Os10g05720	Os10g0148000	Drought tolerance.	OsDIL1	Resistance or Tolerance
LOC_Os03g53500	Os03g0746500	Drought and salinity tolerance.	OsSUV3	Resistance or Tolerance
LOC_Os03g48750	Os03g0693700	Resistance to Rhizoctonia solani.	Osoxo4	Resistance or Tolerance
LOC_Os05g47780	Os05g0551000	Fe acquisition.	OsHRZ2	Resistance or Tolerance
LOC_Os01g67970	Os01g0907400	Resistance to Xanthomonas oryzae pv oryzae.	JMJ705	Resistance or Tolerance
LOC_Os06g46900	Os06g0682900	long-term acquired thermotolerance	HSA32	Resistance or Tolerance
LOC_Os04g58810	Os04g0684900	drought tolerance	OsCAF1B	Resistance or Tolerance
LOC_Os06g48510	Os06g0698785	tolerance to salt stress by accumulation glycine betaine (GB)	OsCMO	Resistance or Tolerance
LOC_Os09g20350	Os09g0369000	"osmotic tolerance, cold stress tolerance "	OsDREB6	Resistance or Tolerance
LOC_Os04g41570	Os04g0493100	defense resistance against rice blast	OsbHLH65	Resistance or Tolerance
LOC_Os05g37350	Os05g0446000	Transposition of transposons.	DNG701	Others
LOC_Os03g02010	Os03g0110800	Pleiotropic developmental defect. de novo and non-CG methylation.	osdrm2	Others

## Sheet: S9
Table S9. Genes specifically expressed in F1 samples or parental lines
Gene_name	Regulation
LOC_Os06g09900	0P_parental lines
LOC_Os06g40704	0P_parental lines
LOC_Os01g04260	0P_parental lines
LOC_Os02g47170	0P_parental lines
LOC_Os03g43510	0P_parental lines
LOC_Os12g31490	0P_parental lines
LOC_Os01g72230	0P_parental lines
LOC_Os02g55590	0P_parental lines
LOC_Os04g45810	0P_parental lines
LOC_Os09g36976	0P_parental lines
LOC_Os09g28440	0P_parental lines
LOC_Os07g01214	0P_parental lines
LOC_Os03g29460	0P_parental lines
LOC_Os12g29330	0P_parental lines
LOC_Os12g41200	0P_parental lines
LOC_Os02g20860	0P_parental lines
LOC_Os03g55800	0P_parental lines
LOC_Os06g39370	0P_parental lines
LOC_Os03g61730	0P_parental lines
LOC_Os01g05130	0P_parental lines
LOC_Os01g49529	0P_parental lines
LOC_Os06g05930	0P_parental lines
LOC_Os04g53950	0P_parental lines
LOC_Os06g46450	0P_parental lines
LOC_Os01g49560	0P_parental lines
LOC_Os02g48840	0P_parental lines
LOC_Os06g42800	0P_parental lines
LOC_Os07g03180	0P_parental lines
LOC_Os03g24940	0P_parental lines
LOC_Os02g43870	0P_parental lines
LOC_Os03g05812	0P_parental lines
LOC_Os03g08080	0P_parental lines
LOC_Os11g26594	0P_parental lines
LOC_Os06g10280	0P_parental lines
LOC_Os05g07640	0P_parental lines
LOC_Os12g06280	0P_parental lines
LOC_Os09g20880	0P_parental lines
LOC_Os08g14490	0P_parental lines
LOC_Os08g02420	0P_parental lines
LOC_Os11g39650	0P_parental lines
LOC_Os03g51150	0P_parental lines
LOC_Os07g04150	0P_parental lines
LOC_Os05g47670	0P_parental lines
LOC_Os03g57349	0P_parental lines
LOC_Os03g19090	0P_parental lines
LOC_Os03g16890	0P_parental lines
LOC_Os02g45480	0P_parental lines
LOC_Os06g04070	0P_parental lines
LOC_Os05g50910	0P_parental lines
LOC_Os08g44680	0P_parental lines
LOC_Os11g47730	0P_parental lines
MSTRG.27819	0P_parental lines
LOC_Os04g58580	0P_parental lines
LOC_Os08g43400	0P_parental lines
LOC_Os05g32060	0P_parental lines
LOC_Os06g12280	0P_parental lines
LOC_Os02g32490	0P_parental lines
LOC_Os04g54300	0P_parental lines
LOC_Os05g46760	0P_parental lines
LOC_Os01g42870	0P_parental lines
LOC_Os08g40180	0P_parental lines
LOC_Os07g49370	0P_parental lines
LOC_Os01g10340	0P_parental lines
LOC_Os02g13150	0P_parental lines
LOC_Os03g05020	0P_parental lines
LOC_Os04g59520	0P_parental lines
LOC_Os08g29500	0P_parental lines
LOC_Os08g41290	0P_parental lines
LOC_Os03g07450	0P_F1
LOC_Os02g17280	0P_F1
LOC_Os02g58670	0P_F1
LOC_Os03g02960	0P_F1
LOC_Os06g45570	0P_F1
LOC_Os04g02780	0P_F1
LOC_Os07g33780	0P_F1
LOC_Os01g54020	0P_F1
LOC_Os03g17120	0P_F1
LOC_Os07g39070	0P_F1
LOC_Os05g38710	0P_F1
LOC_Os04g43922	0P_F1
LOC_Os10g28120	0P_F1
LOC_Os08g31850	0P_F1
LOC_Os03g13740	0P_F1
LOC_Os02g13960	0P_F1
LOC_Os02g12750	0P_F1
LOC_Os08g09210	0P_F1
LOC_Os06g13650	0P_F1
LOC_Os10g38710	0P_F1
LOC_Os05g11090	0P_F1
LOC_Os10g32850	0P_F1
LOC_Os10g36370	0P_F1
LOC_Os03g13000	0P_F1
LOC_Os10g42550	0P_F1
LOC_Os10g38700	0P_F1
LOC_Os11g29700	0P_F1
LOC_Os05g44080	0P_F1
LOC_Os03g52680	0P_F1
LOC_Os09g31490	0P_F1
LOC_Os01g27730	0P_F1
LOC_Os04g52780	0P_F1
LOC_Os02g42310	5P_parental lines
LOC_Os04g27250	5P_parental lines
LOC_Os02g39580	5P_parental lines
LOC_Os01g47330	5P_parental lines
LOC_Os10g43060	5P_parental lines
LOC_Os05g27960	5P_parental lines
LOC_Os10g43075	5P_parental lines
LOC_Os01g64700	5P_parental lines
LOC_Os11g41910	5P_parental lines
LOC_Os08g33320	5P_parental lines
LOC_Os01g16152	5P_parental lines
LOC_Os02g07070	5P_parental lines
LOC_Os08g31510	5P_parental lines
LOC_Os10g36703	5P_parental lines
LOC_Os08g38170	5P_parental lines
LOC_Os03g01710	5P_parental lines
LOC_Os12g31440	5P_parental lines
LOC_Os02g43590	5P_parental lines
LOC_Os02g34860	5P_parental lines
LOC_Os01g73570	5P_parental lines
LOC_Os03g25750	5P_parental lines
LOC_Os06g03640	5P_parental lines
LOC_Os03g60150	5P_parental lines
LOC_Os09g21000	5P_parental lines
LOC_Os08g25799	5P_parental lines
LOC_Os05g33810	5P_parental lines
LOC_Os04g58320	5P_parental lines
LOC_Os05g03174	5P_parental lines
LOC_Os05g32570	5P_parental lines
LOC_Os06g30310	5P_parental lines
LOC_Os04g52164	5P_parental lines
LOC_Os03g24590	5P_parental lines
LOC_Os05g41190	5P_parental lines
LOC_Os04g48390	5P_parental lines
LOC_Os06g11130	5P_parental lines
LOC_Os03g06740	5P_parental lines
LOC_Os01g42700	5P_parental lines
LOC_Os03g55776	5P_parental lines
LOC_Os08g11720	5P_parental lines
LOC_Os02g13560	5P_parental lines
LOC_Os01g47530	5P_parental lines
LOC_Os03g18770	5P_parental lines
LOC_Os06g01760	5P_parental lines
LOC_Os05g07220	5P_parental lines
LOC_Os05g04170	5P_parental lines
LOC_Os03g24600	5P_parental lines
LOC_Os02g43350	5P_parental lines
LOC_Os03g55784	5P_parental lines
LOC_Os01g51540	5P_parental lines
LOC_Os02g54030	5P_parental lines
LOC_Os01g19410	5P_parental lines
LOC_Os03g52770	5P_parental lines
LOC_Os03g59390	5P_parental lines
LOC_Os03g60340	5P_parental lines
LOC_Os12g07230	5P_parental lines
LOC_Os08g28670	5P_parental lines
LOC_Os08g07760	5P_parental lines
LOC_Os01g54560	5P_parental lines
LOC_Os10g42439	5P_parental lines
LOC_Os02g55430	5P_parental lines
LOC_Os01g02010	5P_parental lines
LOC_Os09g01960	5P_parental lines
MSTRG.10524	5P_parental lines
LOC_Os05g23130	5P_parental lines
LOC_Os09g03750	5P_parental lines
LOC_Os02g01370	5P_parental lines
LOC_Os02g01360	5P_parental lines
LOC_Os02g01365	5P_parental lines
LOC_Os01g66030	5P_parental lines
LOC_Os02g01355	5P_parental lines
LOC_Os12g34990	5P_parental lines
LOC_Os06g19660	5P_parental lines
LOC_Os01g57954	5P_parental lines
MSTRG.15346	5P_parental lines
LOC_Os03g20470	5P_parental lines
LOC_Os05g43540	5P_parental lines
LOC_Os05g45490	5P_parental lines
LOC_Os06g19620	5P_parental lines
LOC_Os01g54860	5P_parental lines
LOC_Os01g45910	5P_parental lines
LOC_Os01g21960	5P_parental lines
LOC_Os04g35130	5P_parental lines
LOC_Os08g40180	5P_parental lines
LOC_Os07g28400	5P_parental lines
LOC_Os07g27110	5P_parental lines
LOC_Os02g08018	5P_parental lines
LOC_Os11g07470	5P_parental lines
LOC_Os02g08014	5P_parental lines
LOC_Os02g08010	5P_parental lines
LOC_Os02g57620	5P_parental lines
LOC_Os06g49320	5P_parental lines
LOC_Os07g46520	5P_parental lines
LOC_Os04g17680	5P_parental lines
LOC_Os09g08390	5P_parental lines
LOC_Os01g68030	5P_parental lines
LOC_Os04g55180	5P_parental lines
LOC_Os07g47030	5P_parental lines
LOC_Os04g55190	5P_parental lines
LOC_Os02g06840	5P_parental lines
LOC_Os03g03290	5P_parental lines
LOC_Os01g22600	5P_parental lines
LOC_Os07g09610	5P_parental lines
LOC_Os07g38130	5P_parental lines
LOC_Os01g66200	5P_parental lines
LOC_Os11g06010	5P_parental lines
LOC_Os02g53140	5P_parental lines
LOC_Os05g42190	5P_parental lines
LOC_Os03g12238	5P_parental lines
LOC_Os03g12250	5P_parental lines
LOC_Os01g13690	5P_parental lines
LOC_Os07g10460	5P_parental lines
LOC_Os06g27830	5P_parental lines
LOC_Os07g36200	5P_parental lines
LOC_Os02g10190	5P_parental lines
LOC_Os07g28610	5P_parental lines
LOC_Os01g31470	5P_parental lines
LOC_Os04g57680	5P_parental lines
LOC_Os03g15390	5P_parental lines
LOC_Os05g48270	5P_parental lines
LOC_Os02g54510	5P_parental lines
LOC_Os09g36270	5P_parental lines
LOC_Os11g41160	5P_parental lines
LOC_Os06g09900	5P_F1
LOC_Os09g10850	5P_F1
LOC_Os04g29210	5P_F1
LOC_Os03g13560	5P_F1
LOC_Os09g33960	5P_F1
LOC_Os02g55210	5P_F1
LOC_Os08g03420	5P_F1
LOC_Os07g28850	5P_F1
LOC_Os04g45480	5P_F1
LOC_Os07g37570	5P_F1
LOC_Os03g45260	5P_F1
LOC_Os04g35590	5P_F1
LOC_Os03g56270	5P_F1
LOC_Os11g47530	5P_F1
LOC_Os11g14990	5P_F1
LOC_Os03g23020	5P_F1
LOC_Os03g49190	5P_F1
LOC_Os11g47520	5P_F1
LOC_Os06g16240	5P_F1
LOC_Os07g10110	5P_F1
LOC_Os04g49940	5P_F1
LOC_Os01g32780	5P_F1
LOC_Os01g66720	5P_F1
LOC_Os03g11910	5P_F1
LOC_Os04g17660	5P_F1
LOC_Os07g47620	5P_F1
LOC_Os09g12720	5P_F1
LOC_Os03g45250	5P_F1
LOC_Os01g55030	5P_F1
LOC_Os10g06690	5P_F1
LOC_Os04g02500	5P_F1
LOC_Os06g15820	5P_F1
LOC_Os07g03710	5P_F1
LOC_Os05g02400	5P_F1
LOC_Os10g25850	5P_F1
LOC_Os01g57910	5P_F1
LOC_Os02g43180	5P_F1
LOC_Os01g19770	5P_F1
LOC_Os03g19270	5P_F1
LOC_Os02g35315	5P_F1
LOC_Os06g05020	5P_F1
LOC_Os07g43740	5P_F1
LOC_Os04g49110	5P_F1
LOC_Os03g07600	5P_F1
LOC_Os07g09140	5P_F1
LOC_Os10g35980	5P_F1
LOC_Os06g05000	5P_F1
LOC_Os04g31270	5P_F1
LOC_Os12g38650	5P_F1
LOC_Os02g04010	5P_F1
LOC_Os07g09720	5P_F1
LOC_Os11g31360	5P_F1
LOC_Os01g38530	5P_F1
LOC_Os09g15700	5P_F1
LOC_Os03g53950	5P_F1
LOC_Os01g33350	5P_F1
LOC_Os08g41910	5P_F1
LOC_Os05g41100	5P_F1
LOC_Os05g38740	5P_F1
LOC_Os06g04780	5P_F1
LOC_Os01g14140	5P_F1
LOC_Os08g22604	5P_F1
LOC_Os07g38290	5P_F1
LOC_Os11g43890	5P_F1
LOC_Os03g44300	5P_F1
LOC_Os01g19820	5P_F1
LOC_Os08g19420	5P_F1

## Sheet: S10
Table S10. 188 coDEGs in F1 0P samples relative to parental lines
coDEGs	Regulation
LOC_Os06g06910	up_1HF1
LOC_Os04g38390	up_1HF1
LOC_Os04g57340	up_1HF1
LOC_Os01g71050	up_1HF1
LOC_Os10g28120	up_1HF1
LOC_Os01g57954	up_1HF1
LOC_Os01g71040	up_1HF1
LOC_Os02g50570	up_1HF1
LOC_Os01g03390	up_1HF1
LOC_Os03g52680	up_1HF1
LOC_Os04g52250	up_1HF1
LOC_Os04g52260	up_1HF1
LOC_Os07g04350	up_1HF1
LOC_Os03g55776	down_1HF1
LOC_Os01g46400	down_1HF1
LOC_Os12g17310	down_1HF1
LOC_Os05g05680	down_1HF1
LOC_Os10g27174	down_1HF1
LOC_Os08g35710	down_1HF1
LOC_Os05g47640	down_1HF1
LOC_Os03g29460	down_1HF1
LOC_Os03g56610	down_1HF1
LOC_Os02g49420	down_1HF1
LOC_Os08g13250	down_1HF1
LOC_Os06g44370	down_1HF1
LOC_Os03g51390	down_1HF1
LOC_Os03g62600	down_1HF1
LOC_Os05g41210	down_1HF1
LOC_Os11g03400	down_1HF1
LOC_Os04g59520	down_1HF1
LOC_Os01g04650	down_1HF1
LOC_Os02g37780	down_1HF1
LOC_Os05g39374	down_1HF1
LOC_Os07g05880	down_1HF1
LOC_Os04g45810	down_1HF1
LOC_Os07g48570	down_1HF1
LOC_Os02g08330	down_1HF1
LOC_Os09g38070	down_1HF1
LOC_Os11g04720	down_1HF1
LOC_Os06g28630	down_1HF1
LOC_Os09g36120	down_1HF1
LOC_Os03g15270	down_1HF1
LOC_Os02g37770	down_1HF1
LOC_Os05g45430	down_1HF1
LOC_Os01g67240	down_1HF1
LOC_Os08g38220	down_1HF1
LOC_Os03g02190	down_1HF1
LOC_Os03g03280	down_1HF1
LOC_Os05g42150	down_1HF1
LOC_Os03g22470	down_1HF1
LOC_Os01g62230	down_1HF1
LOC_Os05g30750	down_1HF1
LOC_Os01g45360	down_1HF1
LOC_Os01g62260	down_1HF1
LOC_Os02g49050	down_1HF1
LOC_Os07g37240	down_1HF1
LOC_Os08g44680	down_1HF1
LOC_Os05g02190	down_1HF1
LOC_Os03g19090	down_1HF1
LOC_Os01g10610	down_1HF1
LOC_Os02g07200	down_1HF1
LOC_Os04g58850	down_1HF1
LOC_Os02g37610	down_1HF1
LOC_Os03g18180	down_1HF1
LOC_Os07g39810	down_1HF1
LOC_Os05g12260	down_1HF1
LOC_Os01g72080	down_1HF1
LOC_Os02g20860	down_1HF1
LOC_Os02g39100	down_1HF1
LOC_Os02g55610	down_1HF1
LOC_Os04g40190	down_1HF1
LOC_Os01g67600	down_1HF1
LOC_Os06g48330	down_1HF1
LOC_Os08g42730	down_1HF1
LOC_Os03g57890	down_1HF1
LOC_Os06g11490	down_1HF1
LOC_Os03g01530	down_1HF1
LOC_Os07g09970	down_1HF1
LOC_Os06g22820	down_1HF1
LOC_Os08g14620	down_1HF1
LOC_Os04g54230	down_1HF1
LOC_Os01g39290	down_1HF1
LOC_Os03g14030	down_1HF1
LOC_Os03g37010	down_1HF1
LOC_Os10g12750	down_1HF1
LOC_Os08g31970	down_1HF1
LOC_Os01g27360	down_1HF1
LOC_Os02g45200	down_1HF1
LOC_Os12g35590	down_1HF1
LOC_Os11g30360	down_1HF1
LOC_Os02g55640	down_1HF1
LOC_Os10g35840	down_1HF1
LOC_Os05g39380	down_1HF1
LOC_Os01g38660	down_1HF1
LOC_Os02g32110	down_1HF1
LOC_Os06g30370	down_1HF1
LOC_Os02g37800	down_1HF1
LOC_Os06g04070	down_1HF1
LOC_Os03g48104	down_1HF1
LOC_Os06g11040	down_1HF1
LOC_Os06g33180	down_1HF1
LOC_Os03g55784	down_1HF1
LOC_Os09g36680	up_8HF1
LOC_Os05g38810	up_8HF1
LOC_Os08g31580	up_8HF1
LOC_Os02g48340	up_8HF1
LOC_Os04g38390	up_8HF1
LOC_Os05g51130	up_8HF1
LOC_Os07g12150	up_8HF1
LOC_Os09g30360	up_8HF1
LOC_Os03g39830	up_8HF1
LOC_Os01g69080	up_8HF1
LOC_Os02g35365	up_8HF1
LOC_Os05g48630	up_8HF1
LOC_Os09g30350	up_8HF1
LOC_Os12g27370	up_8HF1
LOC_Os01g60830	up_8HF1
LOC_Os03g16020	up_8HF1
LOC_Os09g38560	up_8HF1
LOC_Os02g35329	up_8HF1
LOC_Os02g38020	up_8HF1
LOC_Os02g02860	up_8HF1
LOC_Os05g42120	up_8HF1
LOC_Os01g47330	up_8HF1
LOC_Os03g03360	up_8HF1
LOC_Os08g06530	up_8HF1
LOC_Os08g09270	up_8HF1
LOC_Os04g28420	up_8HF1
LOC_Os01g16350	up_8HF1
LOC_Os02g02870	up_8HF1
LOC_Os03g63750	up_8HF1
LOC_Os04g47360	up_8HF1
LOC_Os05g07810	up_8HF1
LOC_Os07g48090	up_8HF1
LOC_Os06g50350	down_8HF1
LOC_Os02g01370	down_8HF1
LOC_Os10g40720	down_8HF1
LOC_Os09g30340	down_8HF1
LOC_Os02g45750	down_8HF1
LOC_Os03g15870	down_8HF1
LOC_Os01g04670	down_8HF1
LOC_Os01g46400	down_8HF1
LOC_Os07g10440	down_8HF1
LOC_Os02g01360	down_8HF1
LOC_Os12g32610	down_8HF1
LOC_Os02g01365	down_8HF1
LOC_Os09g30330	down_8HF1
LOC_Os03g29460	down_8HF1
LOC_Os09g20650	down_8HF1
LOC_Os05g48760	down_8HF1
LOC_Os09g30486	down_8HF1
LOC_Os11g06910	down_8HF1
LOC_Os05g39374	down_8HF1
LOC_Os04g45810	down_8HF1
LOC_Os11g06900	down_8HF1
LOC_Os01g22990	down_8HF1
LOC_Os03g55290	down_8HF1
LOC_Os07g38240	down_8HF1
LOC_Os02g30460	down_8HF1
LOC_Os05g41990	down_8HF1
LOC_Os04g52670	down_8HF1
LOC_Os04g38910	down_8HF1
LOC_Os09g31466	down_8HF1
LOC_Os02g01355	down_8HF1
LOC_Os12g05550	down_8HF1
LOC_Os08g29500	down_8HF1
LOC_Os03g08080	down_8HF1
LOC_Os08g37040	down_8HF1
LOC_Os01g65550	down_8HF1
LOC_Os04g36700	down_8HF1
LOC_Os06g14420	down_8HF1
LOC_Os05g32320	down_8HF1
LOC_Os12g25690	down_8HF1
LOC_Os06g41010	down_8HF1
LOC_Os03g55590	down_8HF1
LOC_Os09g34320	down_8HF1
LOC_Os03g08960	down_8HF1
LOC_Os06g22820	down_8HF1
LOC_Os06g14190	down_8HF1
LOC_Os10g06630	down_8HF1
LOC_Os08g33720	down_8HF1
LOC_Os05g39380	down_8HF1
LOC_Os05g13940	down_8HF1
LOC_Os09g25620	down_8HF1
LOC_Os09g25625	down_8HF1
LOC_Os01g41710	down_8HF1
LOC_Os05g01710	down_8HF1
LOC_Os06g06250	down_8HF1

[truncated: 3 more sheets: S11, S12, S13]
